# Supplementary material for: Transurethral resection of the prostate (TURP) versus Rezūm for benign prostatic hyperplasia (BPH): prospective and comparative study
Source: Research Square preprint supplement (doi:10.21203/rs.3.rs-4181054/v1), 2024-04-03
Supplement: Supplementary file 1 [file 5be9fa855d1b234bc1e59846.docx]

Table 2 Comparison of IPSS and QOL scores of patients one year after treatment

| Variable | After 1 year | | Before and after treatment | | | | Comparison between groups |
| --- | --- | --- | --- | --- | --- | --- | --- |
| TURP | Rezūm | TURP | | Rezūm | | P value |
| Change | P value | Change | P value |
| IPSS | 10.15±7.46(8.00) | 8.20±6.86(1.53) | 13.65±6.93 | <0.0001* | 13.10±8.87 | <0.0001* | 0.442 |
| QOL | 1.80±1.20(2.00) | 1.75±1.25(1.00) | 3.25±1.31 | <0.0001* | 3.10±1.52 | <0.0001* | 0.895 |

Data are presented as mean ± SD(median) or mean ± SD . ∗P < 0.05. TURP, Trans Urethral Resection Prostate; Rezūm, Rezūm system, a water vapor thermal therapy; IPSS, International prostatic symptom score, total score:35,mild prostatic hyperplasia:1-7score,moderate prostatic hyperplasia:8-19 score, severe prostatic hyperplasia:20-35 score; QOL, quality of life, Satisfaction with urination, Delighted: 0, Pleased: 1, mostly Satisfied: 2, Mixed about equally satisfied and dissatisfied: 3, Mostly dissatisfied: 4, Unhappy: 5, Terrible: 6;
