# Supplementary material for: Transurethral resection of the prostate (TURP) versus Rezūm for benign prostatic hyperplasia (BPH): prospective and comparative study
Source: Research Square preprint supplement (doi:10.21203/rs.3.rs-4181054/v1), 2024-04-03
Supplement: Supplementary file 2 [file 5cb327cb9c710eea764db7be.docx]

Table 3 Perioperative period comparison between group

| Variable | TURP | Rezūm | T value | P value |
| --- | --- | --- | --- | --- |
| Operative time(min) | 81.25±34.63(79.00) | 11.10±8.33(7.00) | 8.649 | <0.0001* |
| Operative blood loss(ml) | 53.75±37.93(50.00) | 3.95±4.05(2.00) | 5.864 | <0.0001* |
| NRS | 2.65±0.49(3.00) | 0.65±0.67(1.00) | 9.747 | <0.0001* |
| Hospital stay(day) | 6.35±2.41(6.00) | 4.70±2.05(4.00) | 2.507 | 0.021* |
| Duration of hematuria(day) | 4.35±2.01(5.00) | 2.80±1.64(2.00) | 2.476 | 0.023* |
| Extubation time(day) | 5.45±2.37(5.00) | 7.55±2.61(7.00) | -2.611 | 0.017* |

Data are presented as mean ± SD(median) or mean ± SD . ∗P < 0.05. TURP, Trans Urethral Resection Prostate; Rezūm, Rezūm system, a water vapor thermal therapy; NRS, Numerical Rating Scale, No pain: 0 score, mild pain: 1-3 scores, moderate pain: 4-6 scores, severe pain: 7-10 scores; Hospital stay, the hospital time after surgery;
