# Supplementary material for: Transurethral resection of the prostate (TURP) versus Rezūm for benign prostatic hyperplasia (BPH): prospective and comparative study
Source: Research Square preprint supplement (doi:10.21203/rs.3.rs-4181054/v1), 2024-04-03
Supplement: Supplementary file 3 [file 6bc093d077aa7ea0dfb74a6f.docx]

Table1 baseline information

| Variable | TURP | Rezūm | T /χ2 value | P value |
| --- | --- | --- | --- | --- |
| Age | 68.9±7.69(72.5) | 67.1±11.31(66.0) | 0.539 | 0.595 |
| BMI | 25.44±5.02(24.65) | 23.64±2.35(24.34) | 1.490 | 0.153 |
| tPSA | 3.73±2.72(2.93) | 4.04±2.83(3.46) | -0.436 | 0.668 |
| fPSA | 0.92±0.65(0.74) | 0.93±0.59(0.83) | -0.017 | 0.986 |
| fPSA/ tPSA | 0.28±0.09(0.27) | 0.25±0.09(0.26) | 0.654 | 0.521 |
| IPSS | 23.8±5.74(21.00) | 21.3±6.23(21.00) | 1.157 | 0.262 |
| QOL | 5.15±0.59(5.00) | 4.85±0.67(5.00) | 2.042 | 0.055 |
| Drinkig history | 6(30.00%) | 13(65.00%) | 4.912 | 0.027* |
| Smoking history | 5(25.00%) | 9(45.00%) | 1.758 | 0.185 |
| Diabetes | 5(25.00) | 3(15.00%) | 0.625 | 0.429 |
| Hypertension | 3(15.00%) | 5(25.00%) |  | 0.695 |
| Hyperlipidemia | 3(15.00) | 0(0.00%) |  | 0.231 |

Data are presented as mean ± SD(median) or n(%). ∗P < 0.05. TURP, Trans Urethral Resection Prostate; Rezūm, Rezūm system, a water vapor thermal therapy; tPSA, total prostate-specific antigen, normal value:0-4; fPSA, free prostate-specific antigen, normal value:0-0.75; fPSA/ tPSA, normal value:0.15~0.48; IPSS, International prostatic symptom score, total score:35,mild prostatic hyperplasia:1-7score,moderate prostatic hyperplasia:8-19 score, severe prostatic hyperplasia:20-35 score; QOL, quality of life, Satisfaction with urination, Delighted: 0, Pleased: 1, mostly Satisfied: 2, Mixed about equally satisfied and dissatisfied: 3, Mostly dissatisfied: 4, Unhappy: 5, Terrible: 6;
